# Supplementary material for: Robust ferromagnetism in two-dimensional GeC/CrN heterobilayers
Source: Royal Society of Chemistry journal article supplement (doi:10.1039/d3cp01731a), 2023-01-01
Supplement: d3cp01731a1.pdf [file d3cp01731a1.pdf]

**Supplemental Material for  
Robust ferromagnetism in two-dimensional GeC/CrN heterobilayer**

TABLE SI: Structural parameters of the GeC/CrN heterostructure. The lattice constant ( $a$ ), interlayer distance ( $d$ ), buckling parameter ( $\delta_{GeC(CrN)}$ ), binding energy ( $E_b$ ) and charge transfer between CrN and GeC layers ( $\Delta Q$ ), net magnetization ( $M$ ), Hubbard  $U$  parameters.

| system                                     | $d$ (Å) | $E_b$ (eV/atom) | $\Delta Q$ ( $ e $ ) | $M$ ( $\mu_B$ /per Cr atom) | $U$ (eV) |
|--------------------------------------------|---------|-----------------|----------------------|-----------------------------|----------|
| $\sqrt{7}$ ( $\theta_{TW} = 38.7^\circ$ )  | 3.13    | 0.069           | 0.0665               | 3.0                         | 4        |
| $\sqrt{13}$ ( $\theta_{TW} = 28.3^\circ$ ) | 3.14    | 0.072           | 0.0564               | 3.0                         | 4        |
| $\sqrt{19}$ ( $\theta_{TW} = 47.5^\circ$ ) | 3.05    | 0.069           | 0.1034               | 3.0                         | 4        |
| AA                                         | 3.24    | 0.050           | 0.0183               | 3.0                         | 4.2      |
| AB                                         | 3.25    | 0.064           | 0.0162               | 3.0                         | 3.8      |
| AA*                                        | 2.84    | 0.099           | 0.0195               | 3.0                         | 4.2      |
| AB*                                        | 2.79    | 0.100           | 0.0646               | 2.8                         | 3.8      |

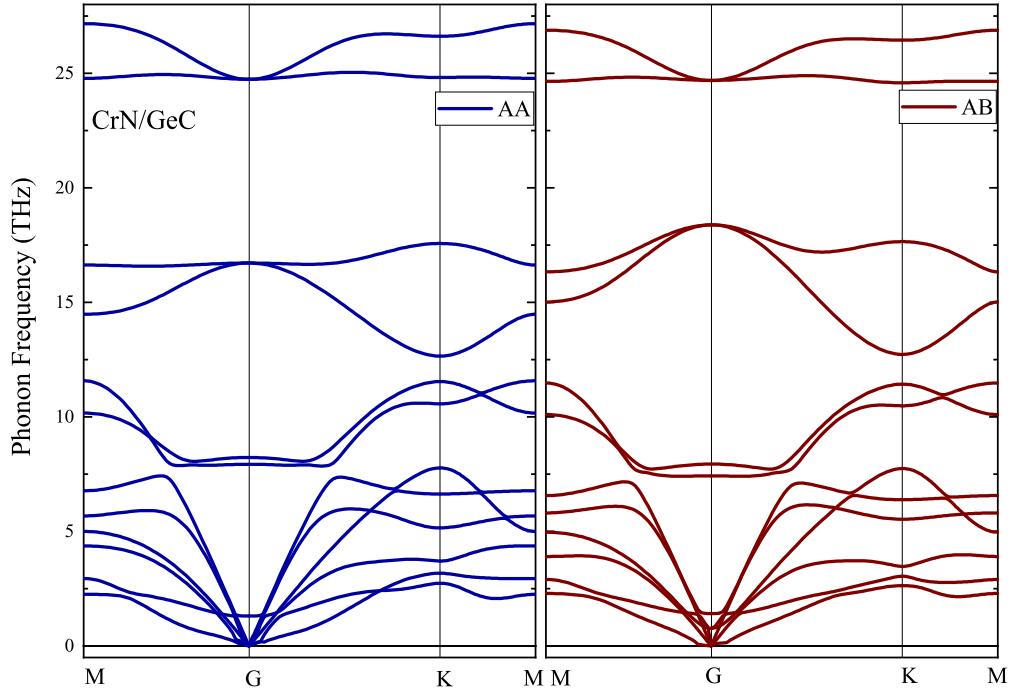

FIG. S1: The phonon spectra of (a) AA and (b) AB stackings of GeC/CrN

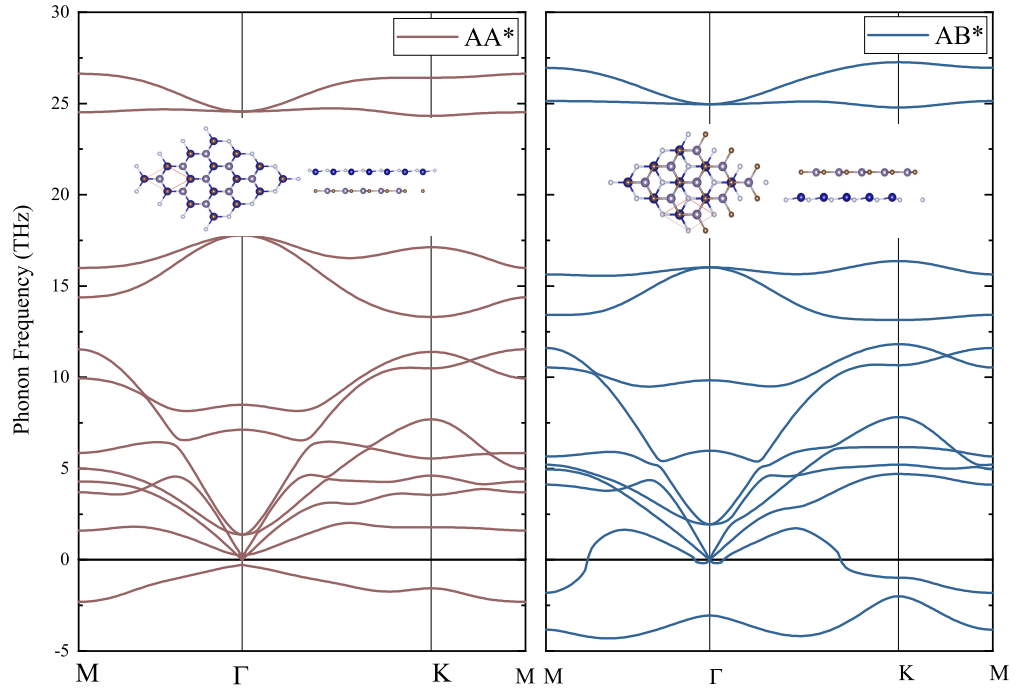

FIG. S2: The phonon spectra of (a) AA\* and (b) AB\* (unstable stackings) of GeC/CrN

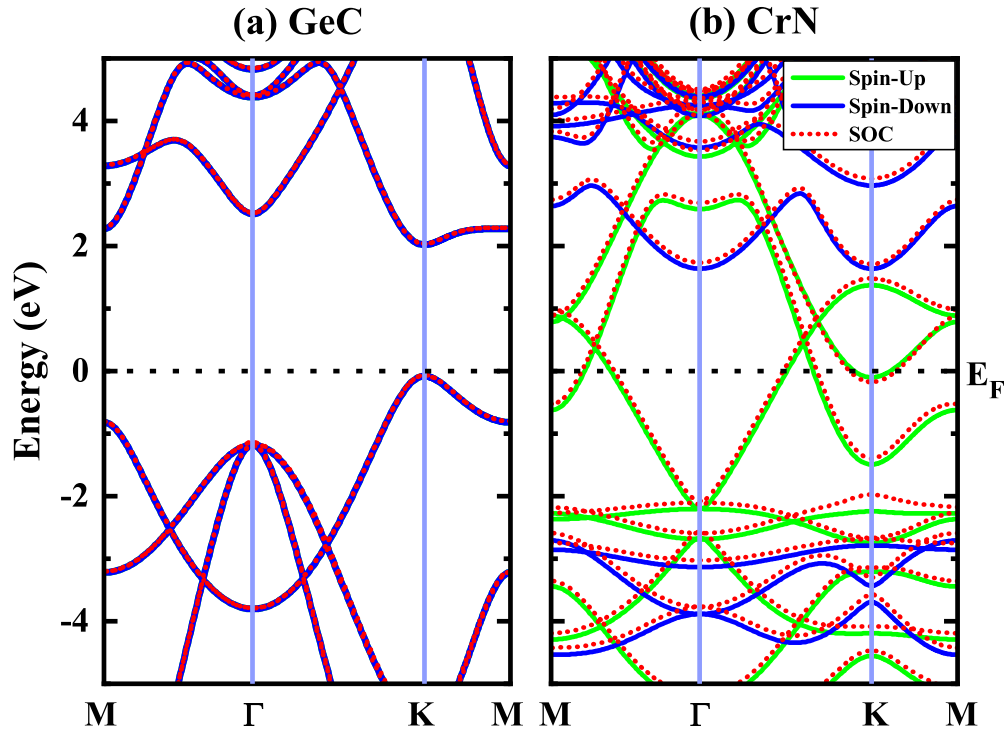

FIG. S3: The energy band spectrum of pristine (a) GeC monolayer and (b) CrN monolayer. The Fermi level is set to be zero.

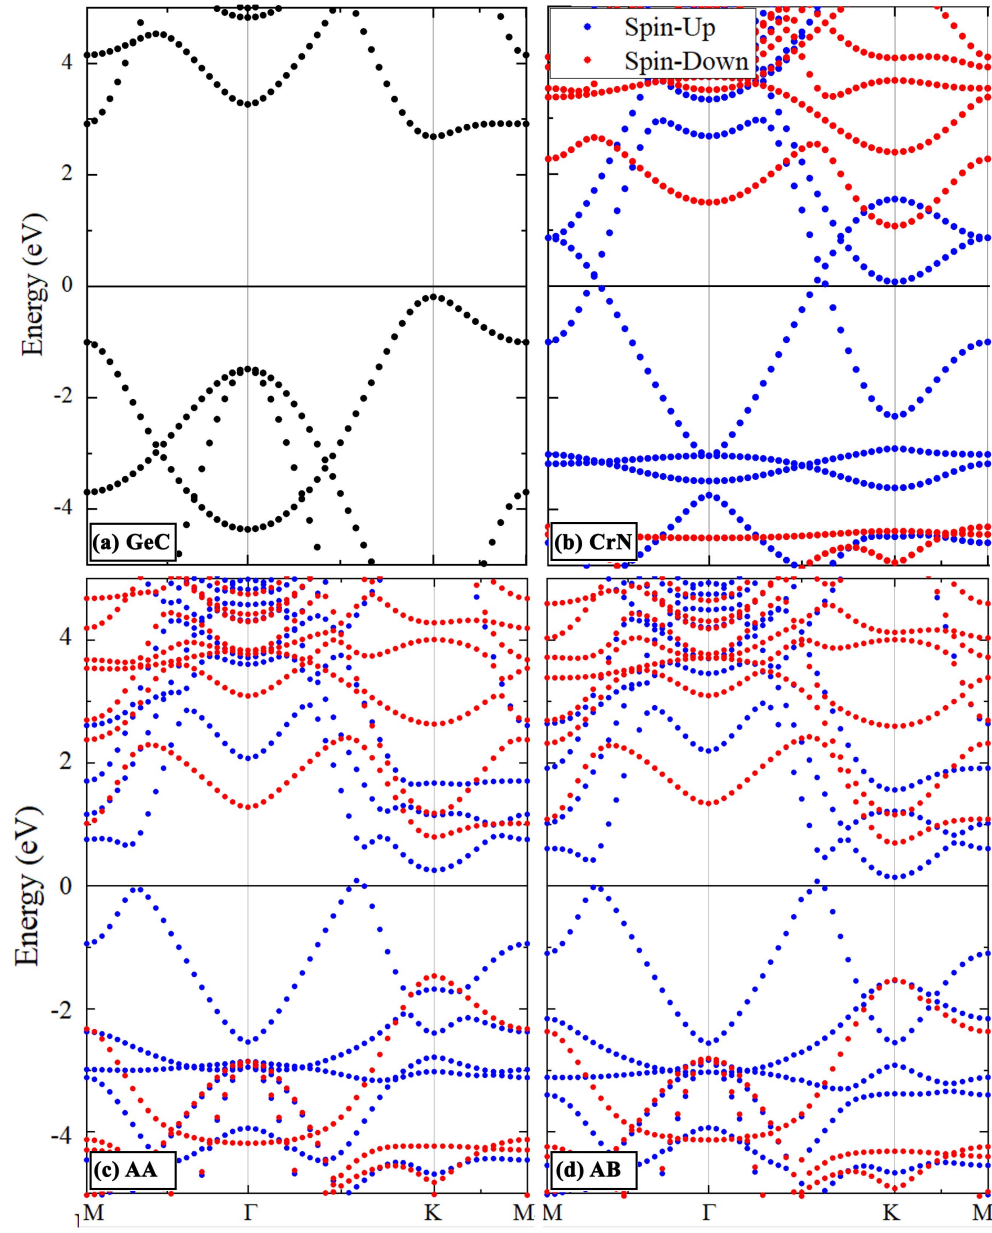

FIG. S4: The energy band spectrum of (a) GeC monolayer and (b) CrN monolayer, (c) AA and (d) AB for HSE06. The Fermi level is set to be zero.

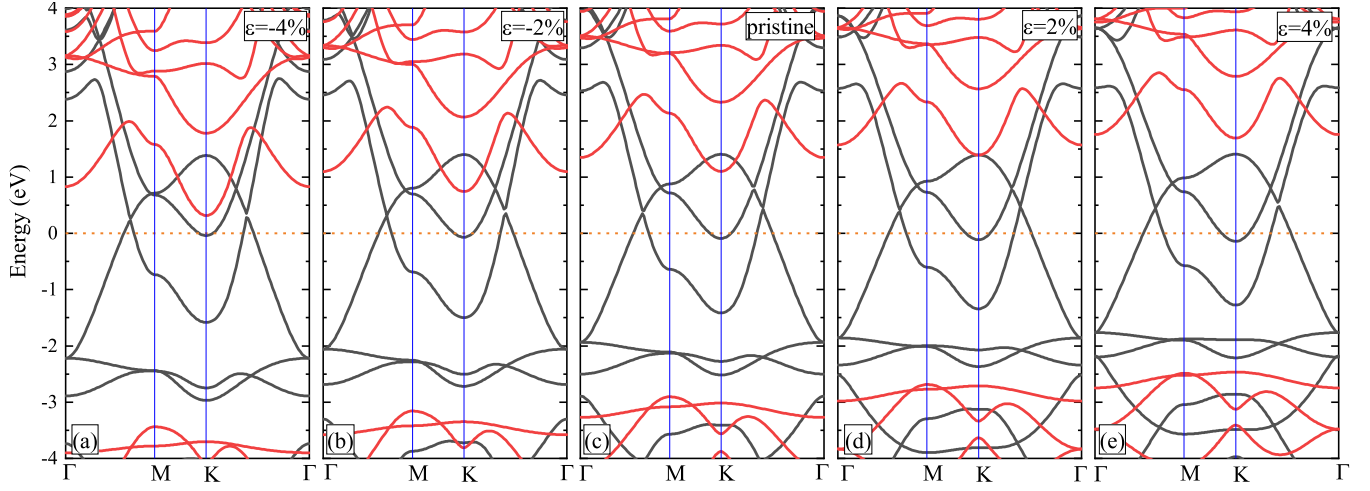

FIG. S5: The band spectrum of monolayer CrN under biaxial strain. The Fermi level is set to be zero.

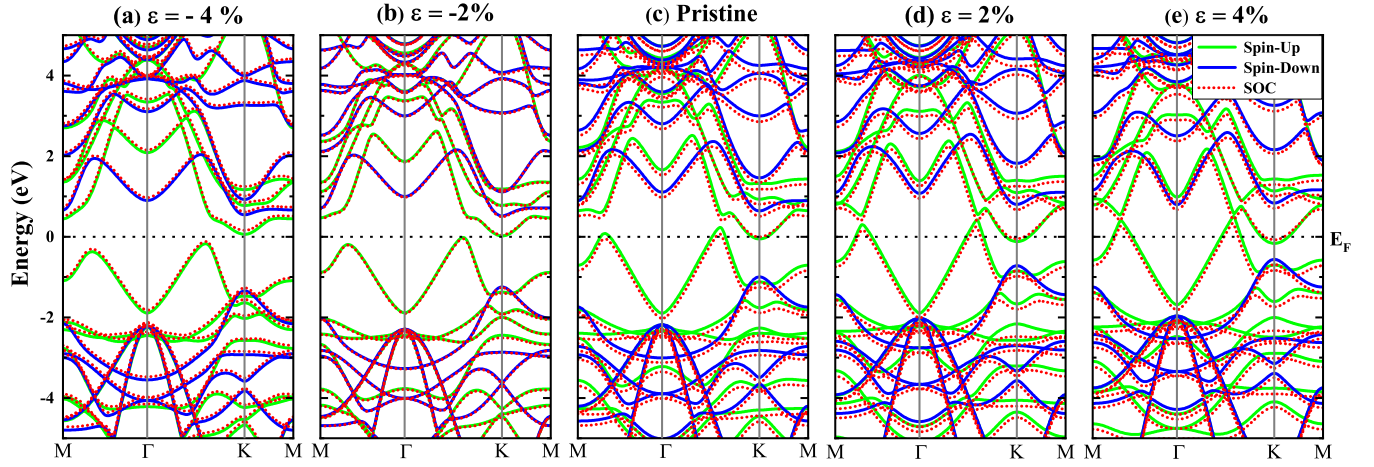

FIG. S6: The band structure of AA for (a)  $\varepsilon = -4\%$ , (b)  $\varepsilon = -2\%$  under compressive strain, (c) pristine, (d)  $\varepsilon = 2\%$ , and (e)  $\varepsilon = 4\%$  under tensile strain. The Fermi level is set to be zero.

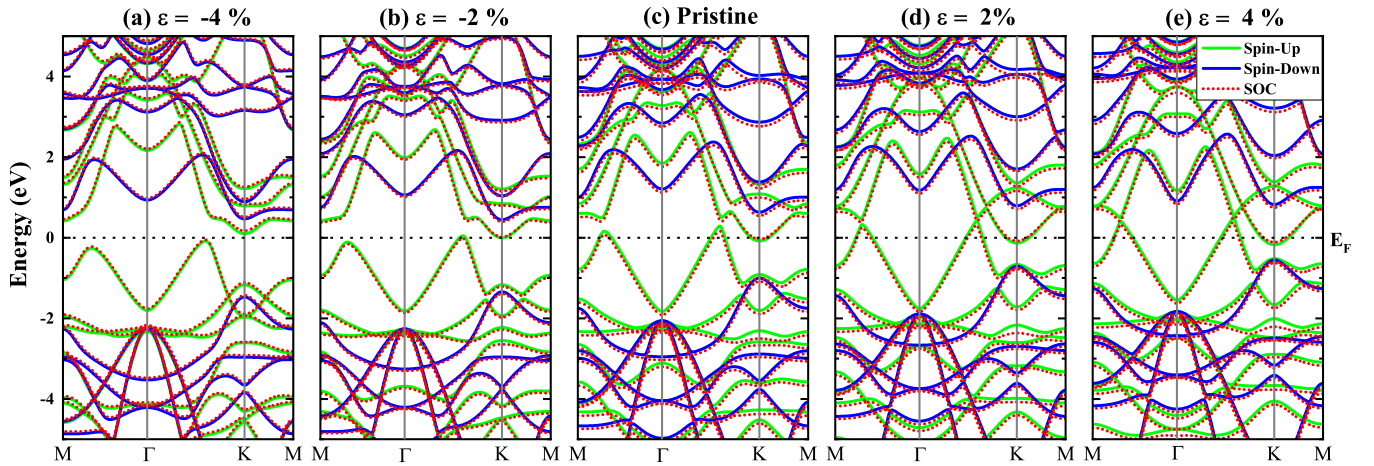

FIG. S7: The band structure of AB for (a)  $\varepsilon = -4\%$ , (b)  $\varepsilon = -2\%$  under compressive strain, (c) pristine, (d)  $\varepsilon = 2\%$ , and (e)  $\varepsilon = 4\%$  under tensile strain. The Fermi level is set to be zero.

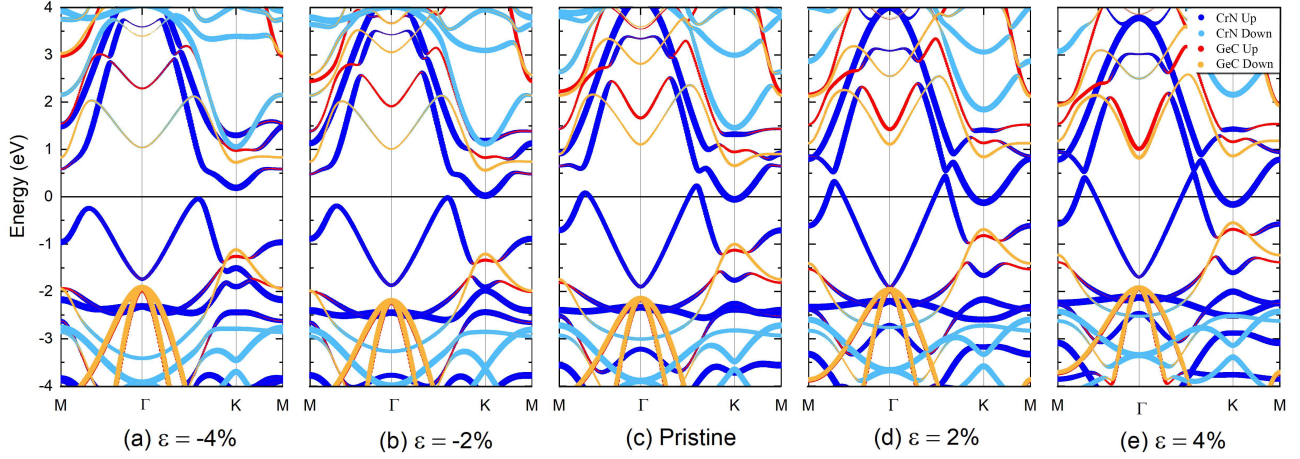

FIG. S8: The partial band structure of AA for (a)  $\varepsilon = -4\%$ , (b)  $\varepsilon = -2\%$  under compressive strain, (c) pristine, (d)  $\varepsilon = 2\%$ , and (e)  $\varepsilon = 4\%$  under tensile strain. The Fermi level is set to be zero.

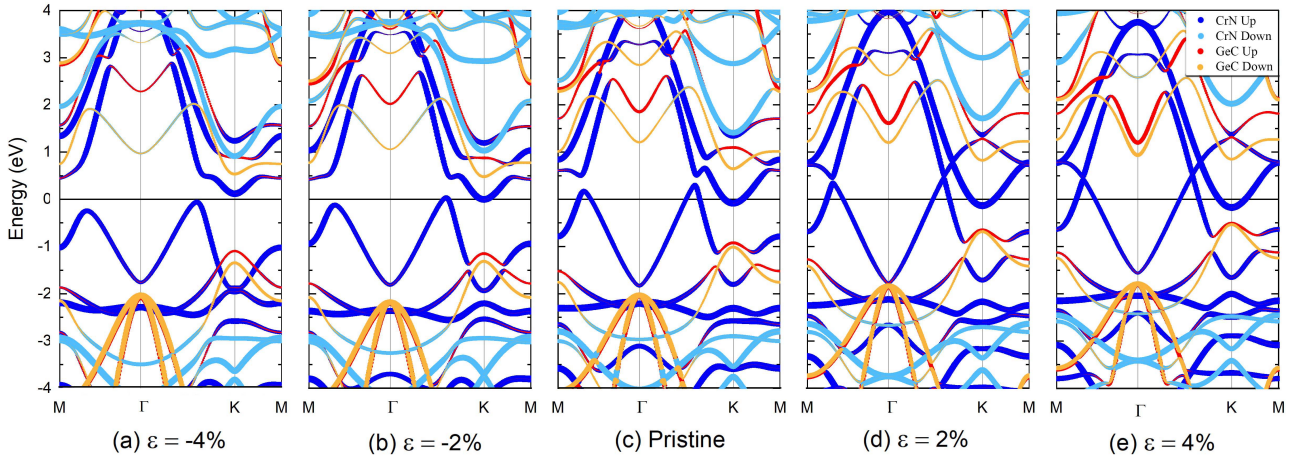

FIG. S9: The partial band structure of AB for (a)  $\varepsilon = -4\%$ , (b)  $\varepsilon = -2\%$  under compressive strain, (c) pristine, (d)  $\varepsilon = 2\%$ , and (e)  $\varepsilon = 4\%$  under tensile strain. The Fermi level is set to be zero.

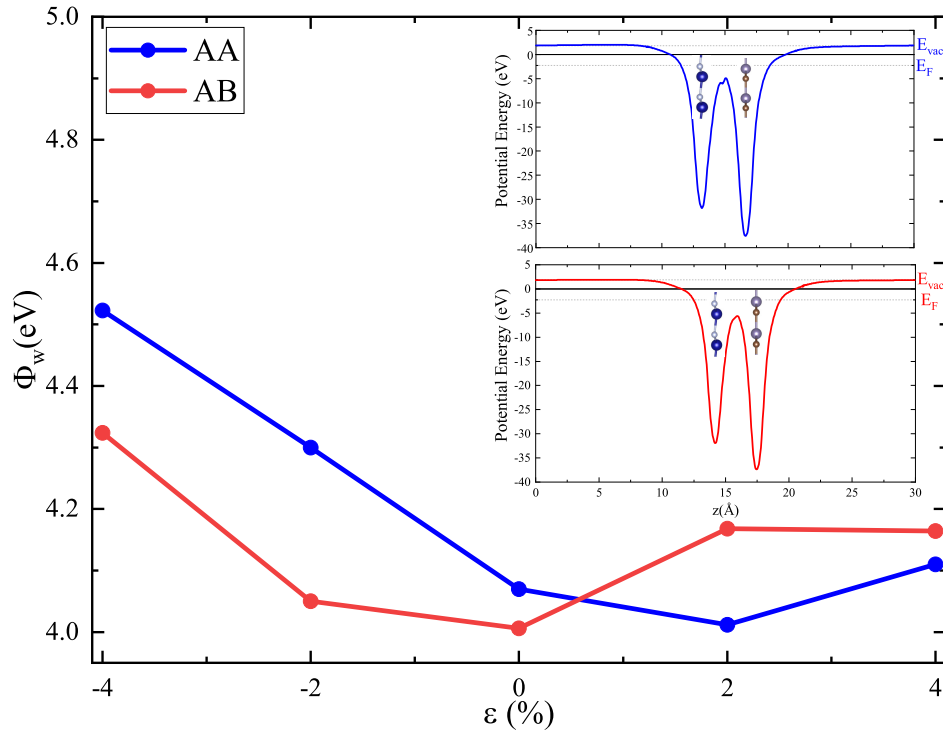

FIG. S10: The calculated work function ( $\Phi_w$ ) of GeC/CrN heterobilayers as a function of strain. Inset: Electrostatic potential energy of AA and AB. The Fermi and the vacuum energies are marked on the potential energy figure.

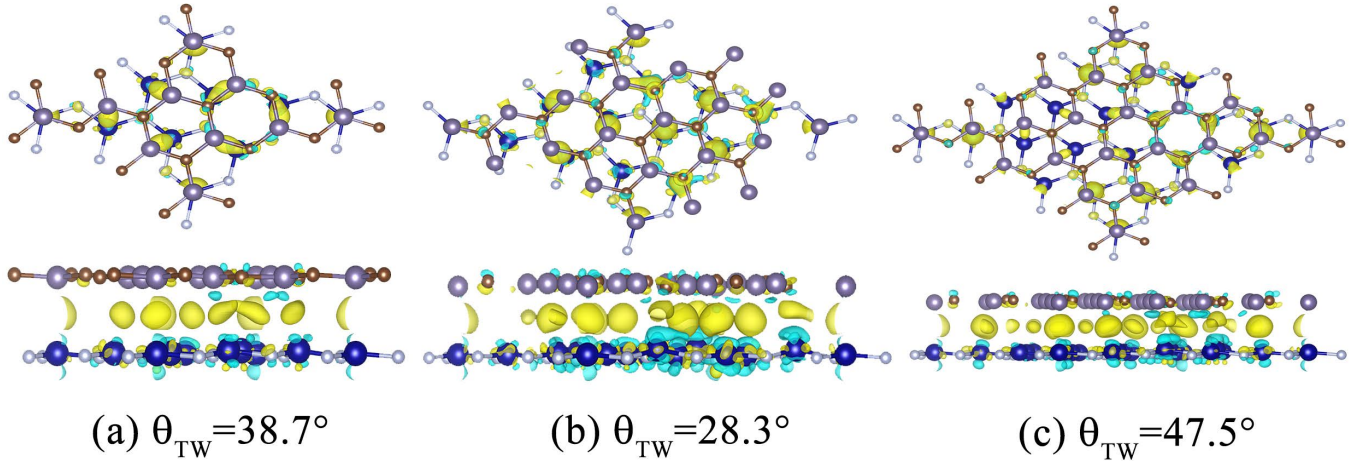

FIG. S11: The charge density differences for (a)  $\theta_{TW} = 38.7^\circ$ , (b)  $\theta_{TW} = 28.3^\circ$  and (c)  $\theta_{TW} = 47.5^\circ$  of twisted GeC/CrN heterobilayer. The isosurface value is set to be  $0.0015 \text{ e}\text{\AA}^{-3}$  for all figures.

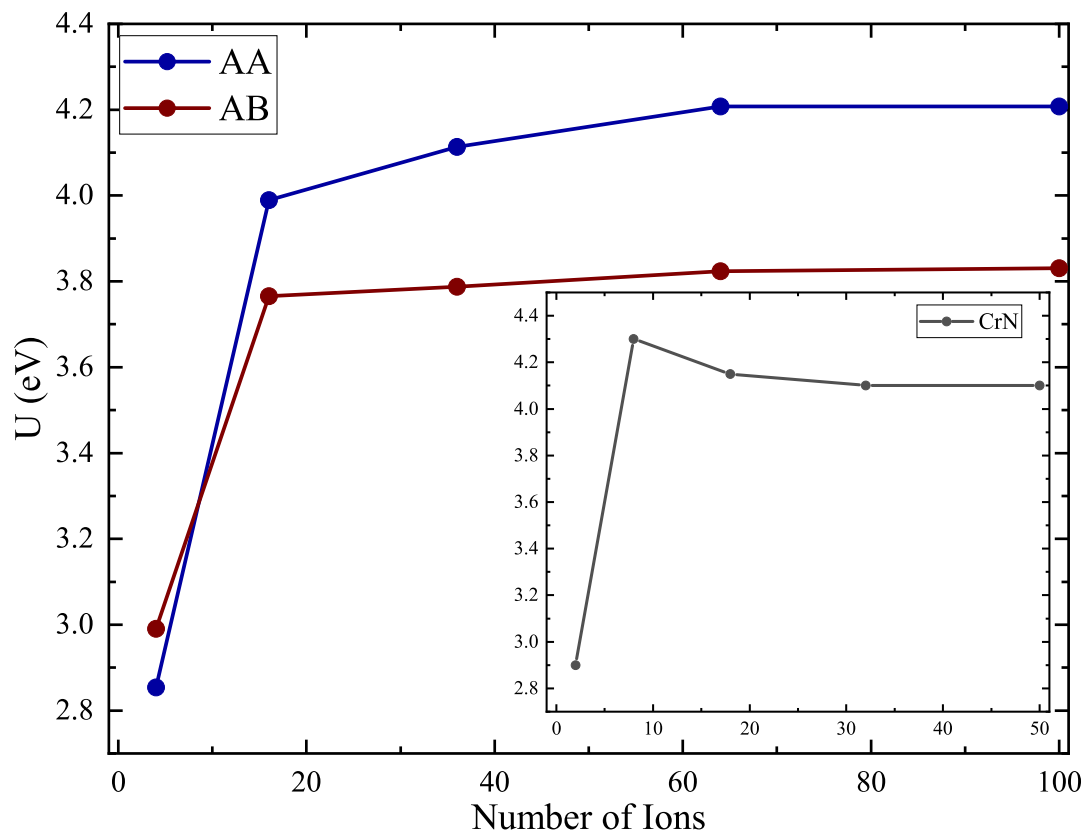

FIG. S12: The calculated Hubbard ( $U$ ) parameters of AA, AB, and CrN monolayer by using the linear response theory.
